# Supplementary material for: Fused pyrazole-phenanthridine based dyads: synthesis, photo-physical and theoretical studies, and live cell pH imaging
Source: Royal Society of Chemistry journal article supplement (doi:10.1039/c9ra07860f), 2019-01-01
Supplement: c9ra07860f1.pdf [file c9ra07860f1.pdf]

**Supporting Information for**  
**Fused pyrazole-phenanthridine based dyads: Synthesis, photo-physical and theoretical**  
**studies, and live cell pH imaging**

VenkatesanMuthukumar<sup>a</sup>, SathishkumarMunusamy<sup>b</sup>, Krishnan Thirumoorthy<sup>a</sup>, Sathish Sawminathan<sup>a</sup> and Kulathu Iyer Sathiyarayanan<sup>a\*</sup>

<sup>a</sup>*Chemistry Department, School of Advanced Sciences, Vellore Institute of Technology University, Vellore-632014, Tamil Nadu, India*

<sup>b</sup>Institute of Physical Sciences, National Autonomous University of Mexico, Mexico

E-mail: [sathiya\\_kuna@hotmail.com](mailto:sathiya_kuna@hotmail.com)

Supporting Information ContentPageN0

| S. No | Figure No | TITLE                                                                                                                                    | Page. No |
|-------|-----------|------------------------------------------------------------------------------------------------------------------------------------------|----------|
| 1     | Fig.S1    | <sup>1</sup> H spectra of compound 1.....                                                                                                | 3        |
| 2     | Fig.S2    | <sup>13</sup> C spectra of compound 1.....                                                                                               | 3        |
| 3     | Fig.S3    | <sup>1</sup> H spectra of compound 1a.....                                                                                               | 4        |
| 4     | Fig.S4    | <sup>13</sup> C spectra of compound 1a.....                                                                                              | 4        |
| 5     | Fig.S5    | <sup>1</sup> H spectra of compound 1b.....                                                                                               | 5        |
| 6     | Fig.S6    | <sup>13</sup> C spectra of compound 1b.....                                                                                              | 5        |
| 7     | Fig.S7    | <sup>1</sup> H spectra of compound 1c.....                                                                                               | 6        |
| 8     | Fig.S8    | <sup>13</sup> C spectra of compound 1c.....                                                                                              | 6        |
| 9     | Fig.S9    | <sup>1</sup> H spectra of compound 2a.....                                                                                               | 7        |
| 10    | Fig.S10   | <sup>13</sup> C spectra of compound 2a.....                                                                                              | 7        |
| 11    | Fig.S11   | <sup>1</sup> H spectra of compound 2b.....                                                                                               | 8        |
| 12    | Fig.S12   | <sup>13</sup> C spectra of compound 2b.....                                                                                              | 8        |
| 13    | Fig.S13   | <sup>1</sup> H spectra of compound 2c.....                                                                                               | 9        |
| 14    | Fig.S14   | <sup>13</sup> C spectra of compound 2c.....                                                                                              | 9        |
| 15    | Fig.S15   | <sup>1</sup> H spectra of compound 2d.....                                                                                               | 10       |
| 16    | Fig.S16   | <sup>13</sup> C spectra of compound 2d.....                                                                                              | 10       |
| 17    | Fig.S17   | HRMS spectra of compound 2a.....                                                                                                         | 11       |
| 18    | Fig.S18   | HRMS spectra of compound 2b.....                                                                                                         | 12       |
| 19    | Fig.S19   | Normalized absorption spectra of compound 2a-2d (2 x 10 <sup>-5</sup> M) in chloroform solvent.....                                      | 13       |
| 20    | Fig.S20   | (A) The absorption spectra of the compound 2b (2 x 10 <sup>-5</sup> ) in chloroform solvent over the addition of TFA. (B) The absorption |          |

|    |         |                                                                                                                                                                                                                                                                                                                                              |          |
|----|---------|----------------------------------------------------------------------------------------------------------------------------------------------------------------------------------------------------------------------------------------------------------------------------------------------------------------------------------------------|----------|
| 21 | Fig.S21 | spectra of the compound 2b with TFA over the addition of TEA.....<br>Normalized emission spectra of compound 2a & 2b ( $2 \times 10^{-5}$ M)<br>in chloroform solvent ( $\lambda_{\text{ex}} = 267\text{nm}$ ).....                                                                                                                          | 13<br>14 |
| 22 | Fig.S22 | The ratio of the emission intensity $I_{392}/I_{457}$ vs concentration of<br>TFA for 2a (A) and $I_{397}/I_{463}$ for 2b vs concentration of TFA (B).....                                                                                                                                                                                    | 14       |
| 23 | Fig.S23 | (A) Emission spectra of the compound 2a + $\text{H}^+$ ( $2 \times 10^{-5}$ ) in chloroform<br>solvent over the addition of TEA ( $\lambda_{\text{ex}} = 267$ nm). (B) Emission<br>spectra of the compound 2b + $\text{H}^+$ ( $2 \times 10^{-5}$ ) in chloroform solvent over<br>the addition of TEA ( $\lambda_{\text{ex}} = 267$ nm)..... | 15       |
| 24 | Fig.S24 | The fluorescence spectra of probe 2b ( $2 \times 10^{-5}$ M) over<br>the addition of various testing ion (10.0 equiv. for each ion) in<br>1:1 PBS buffer (pH = 7.4) and acetonitrile<br>solvent.....                                                                                                                                         | 15       |
| 25 | Fig.S25 | The optimized geometries of 2b at B3LYP/6-31+G*.....                                                                                                                                                                                                                                                                                         | 16       |
| 26 | Fig.S26 | The structure optimization of 2b in TFA solvent at B3LYP/6-31+G*.....                                                                                                                                                                                                                                                                        | 16       |
| 27 | Fig.S27 | The FMO pairs responsible for the excitation energy in 2b and 2b-<br>TFA.....                                                                                                                                                                                                                                                                | 17       |
| 28 | Fig.S28 | The MO pairs responsible for UV-Vis wavelength absorption maximum,<br>$\lambda_{\text{max}}$ (nm) in 2b and 2b-TFA.....                                                                                                                                                                                                                      | 18       |
| 29 | Fig.S29 | The cytotoxicity of 2a and 2b in <i>E.coli</i> .....                                                                                                                                                                                                                                                                                         | 20       |
| 29 | Table1  | Cartesian coordinates (in Å units) of the optimized ground state<br>geometries of <b>2a</b> and <b>2b</b> .....                                                                                                                                                                                                                              | 20       |
| 30 | Table2  | Cartesian coordinates (in Å units) of the optimized ground state<br>geometries of <b>2a-TFA</b> and <b>2b-TFA</b> .....                                                                                                                                                                                                                      | 22       |
| 31 | Table3  | The absolute energy of the optimized ground state geometries of <b>2a</b> , <b>2b</b> ,<br><b>2a-TFA</b> , and <b>2b-TFA</b> .....                                                                                                                                                                                                           | 24       |

**Figure S1:**  $^1\text{H}$  Spectra of compound 1

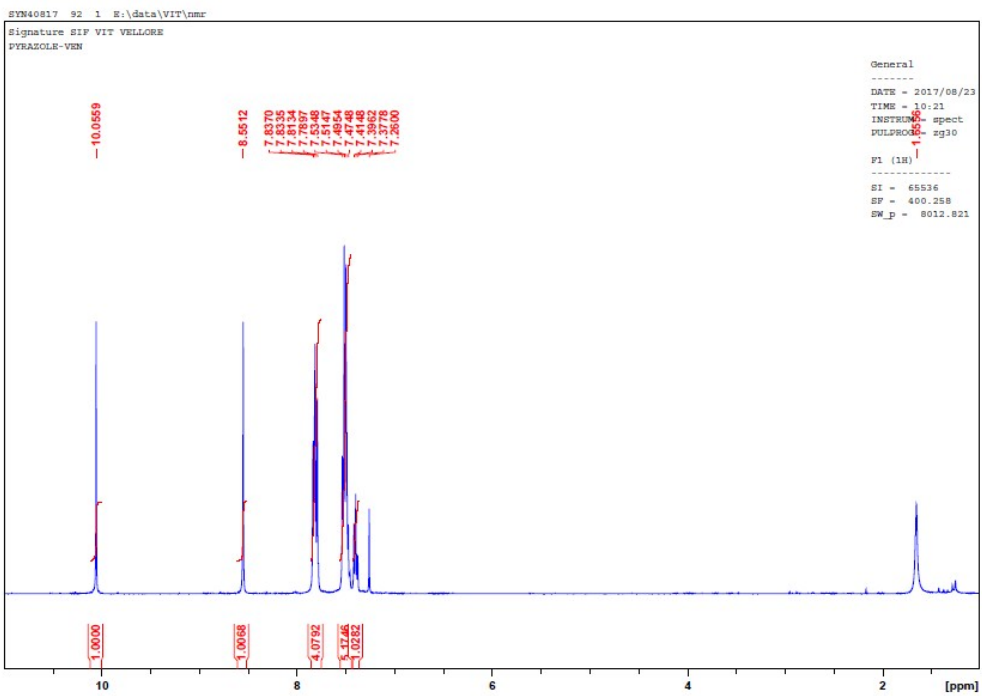

**Figure S2:**  $^{13}\text{C}$  Spectra of compound 1

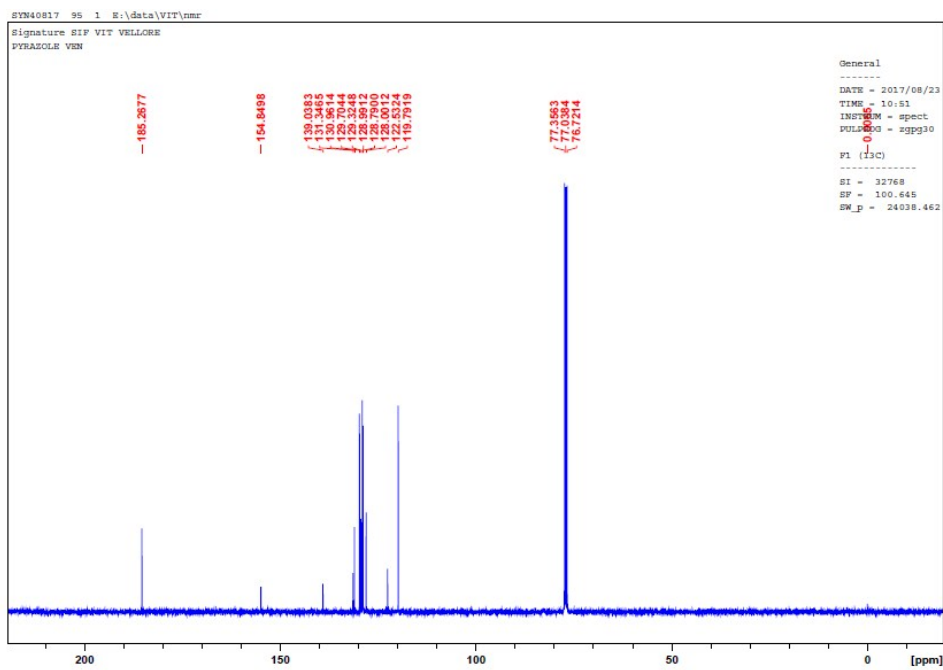

Figure S3:  $^1\text{H}$  Spectra of compound 1a

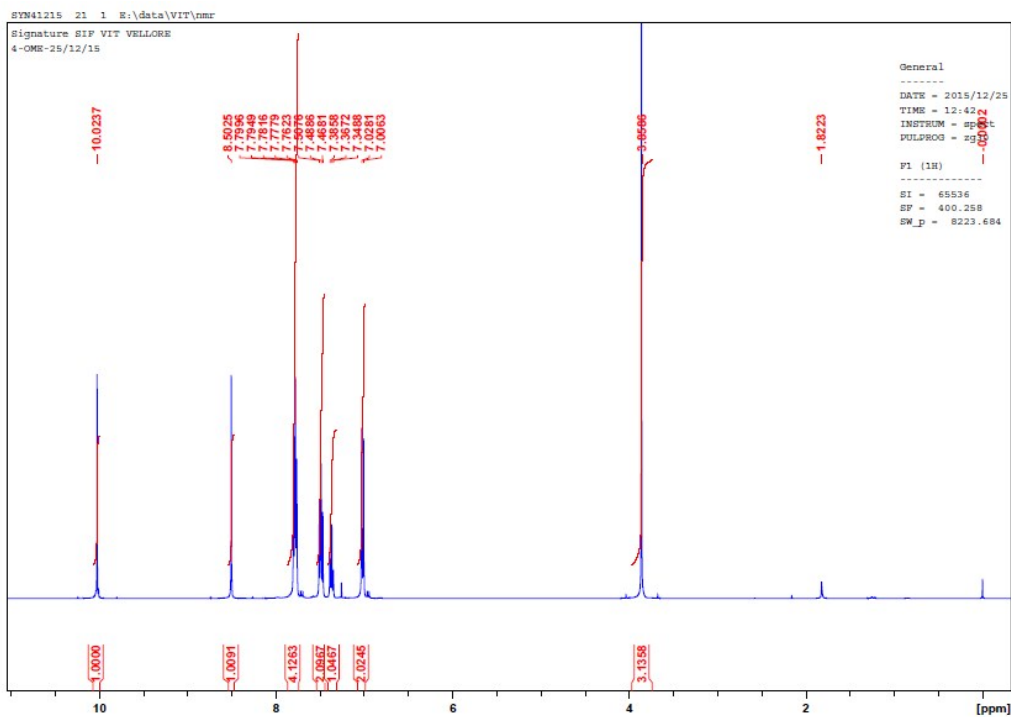

Figure S4:  $^{13}\text{C}$  Spectra of compound 1a

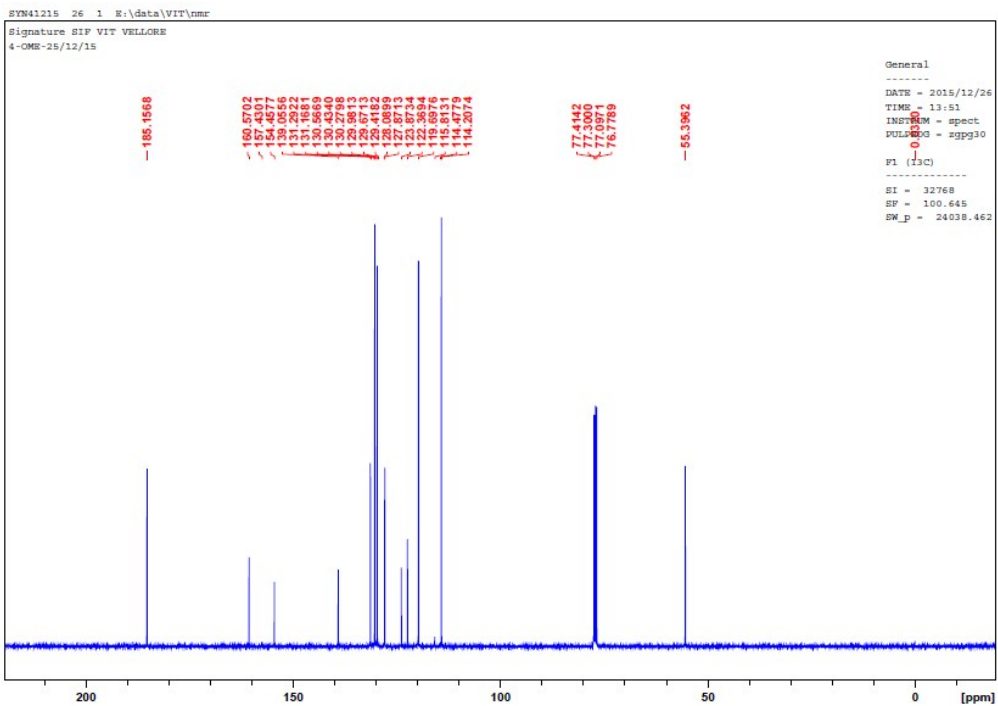

Figure S5:  $^1\text{H}$  Spectra of compound 1b

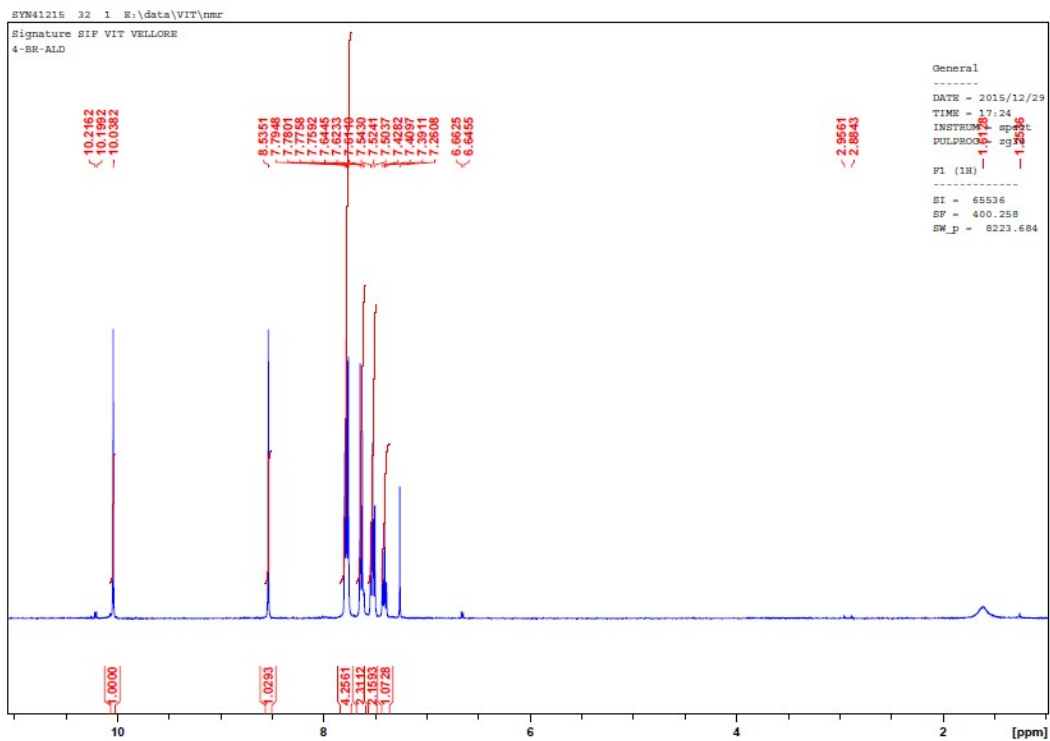

Figure S6:  $^{13}\text{C}$  Spectra of compound 1b

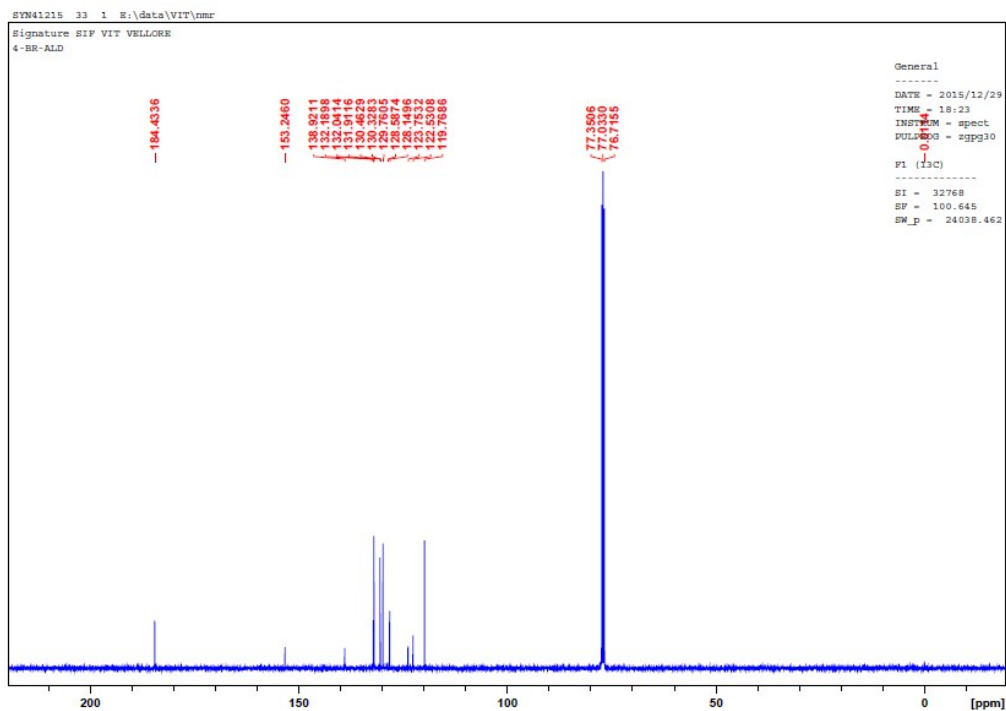

Figure S7: <sup>1</sup>H Spectra of compound 1c

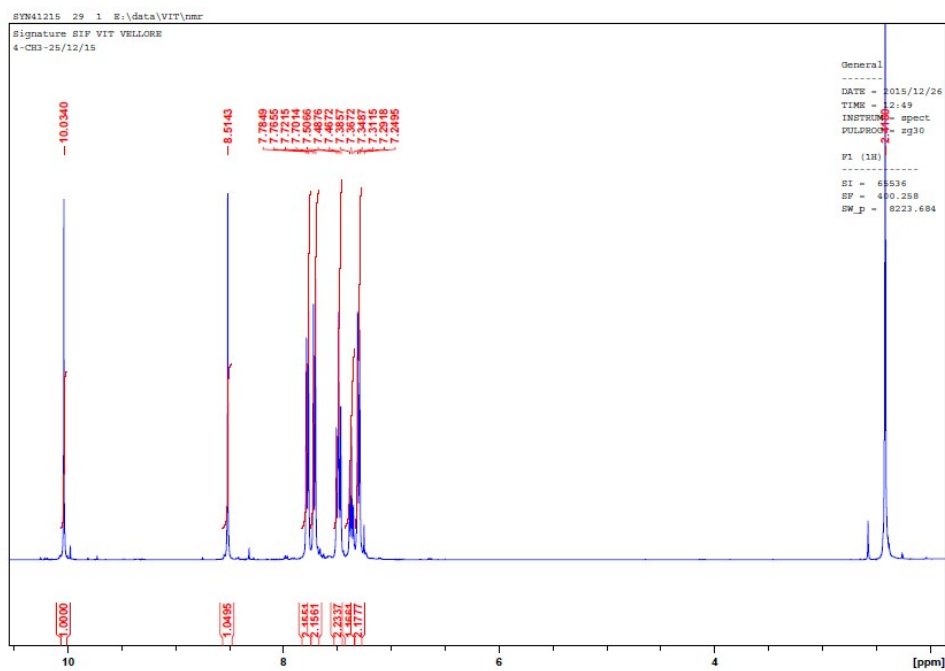

Figure S8: <sup>13</sup>C Spectra of compound 1c

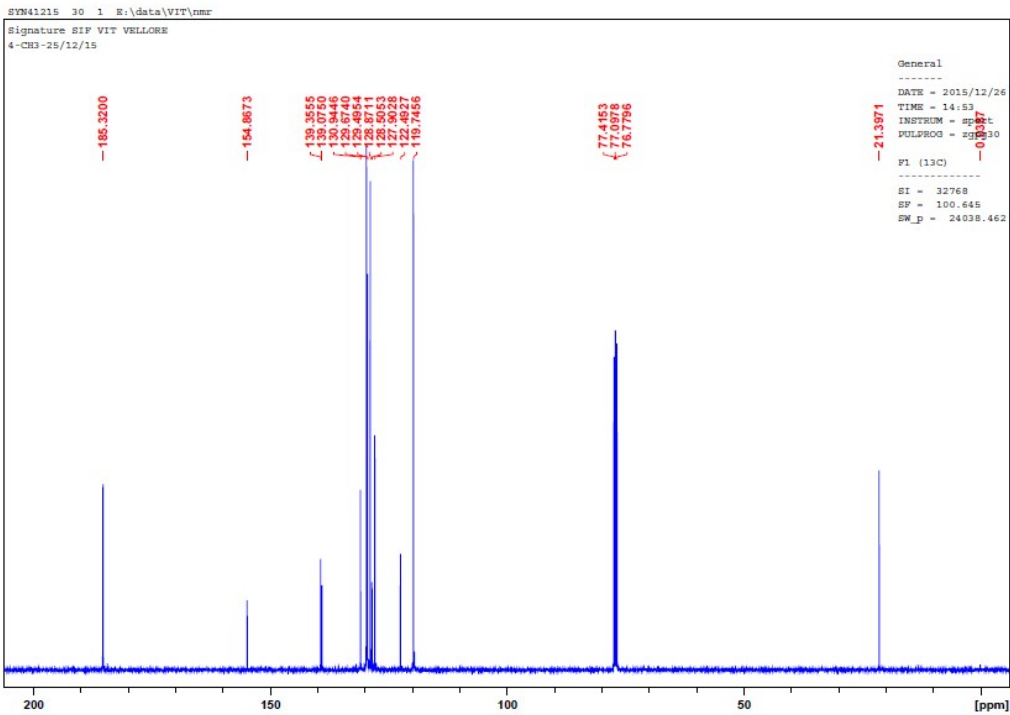

Figure S9: <sup>13</sup>C Spectra of compound 2a

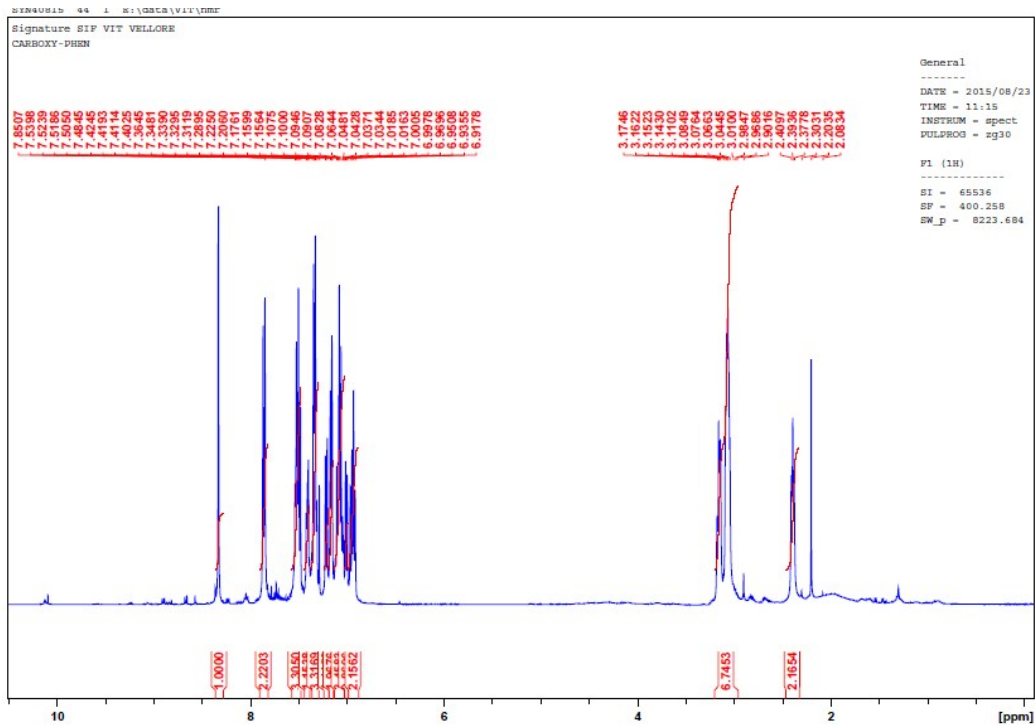

Figure S10: <sup>13</sup>C Spectra of compound 2a

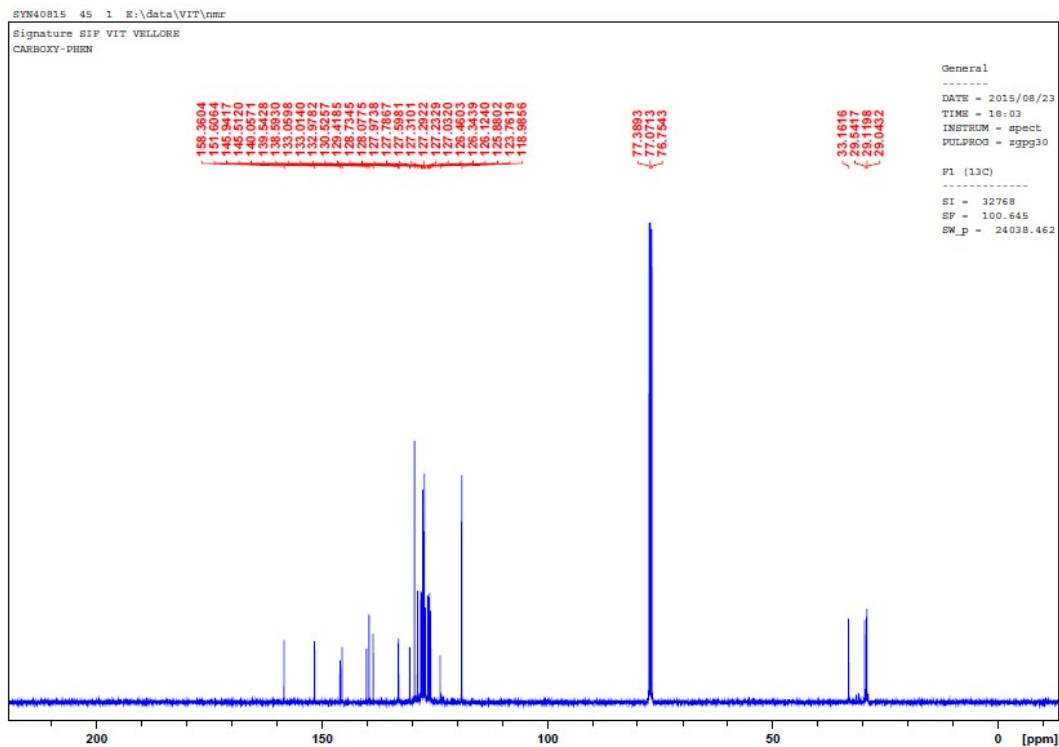

Figure S11:  $^1\text{H}$  Spectra of compound 2b

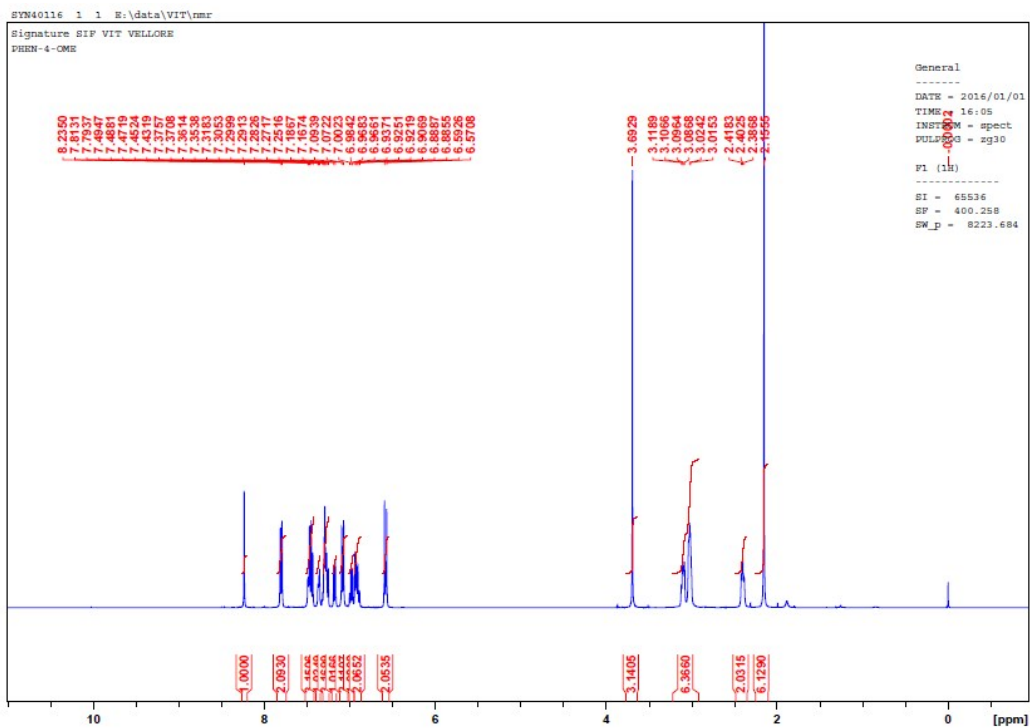

Figure S12:  $^{13}\text{C}$  Spectra of compound 2b



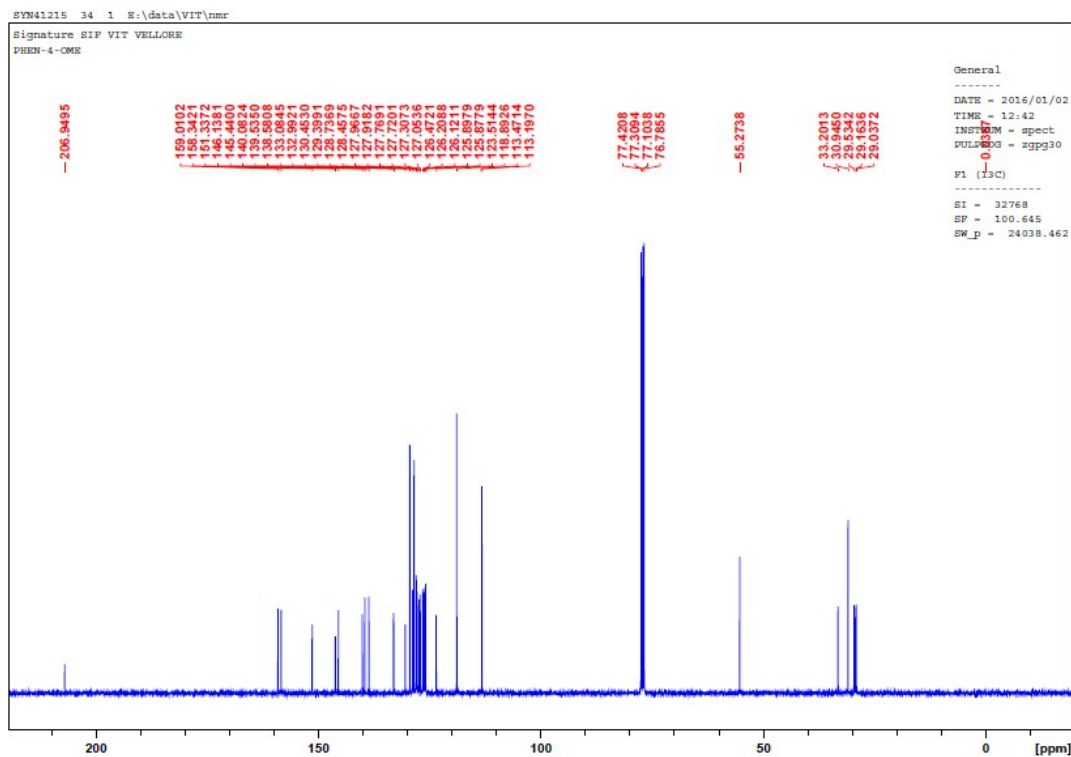

Figure S13: <sup>1</sup>H Spectra of compound 2c

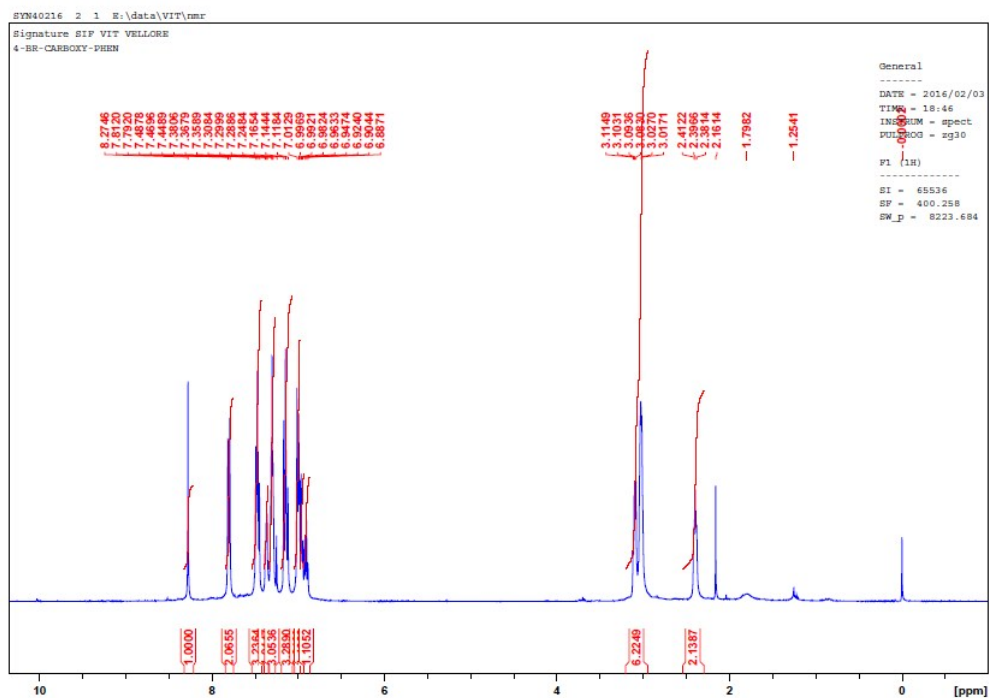

Figure S14: <sup>13</sup>C Spectra of compound 2c

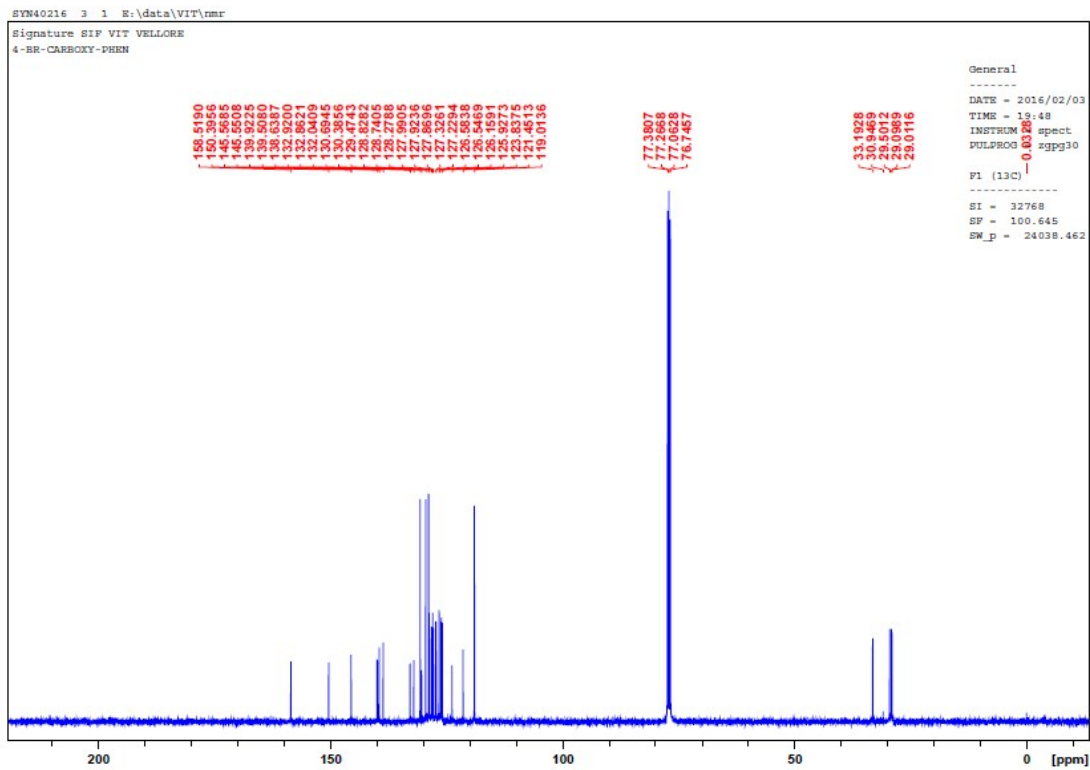

Figure S15:  $^1\text{H}$  Spectra of compound 2d

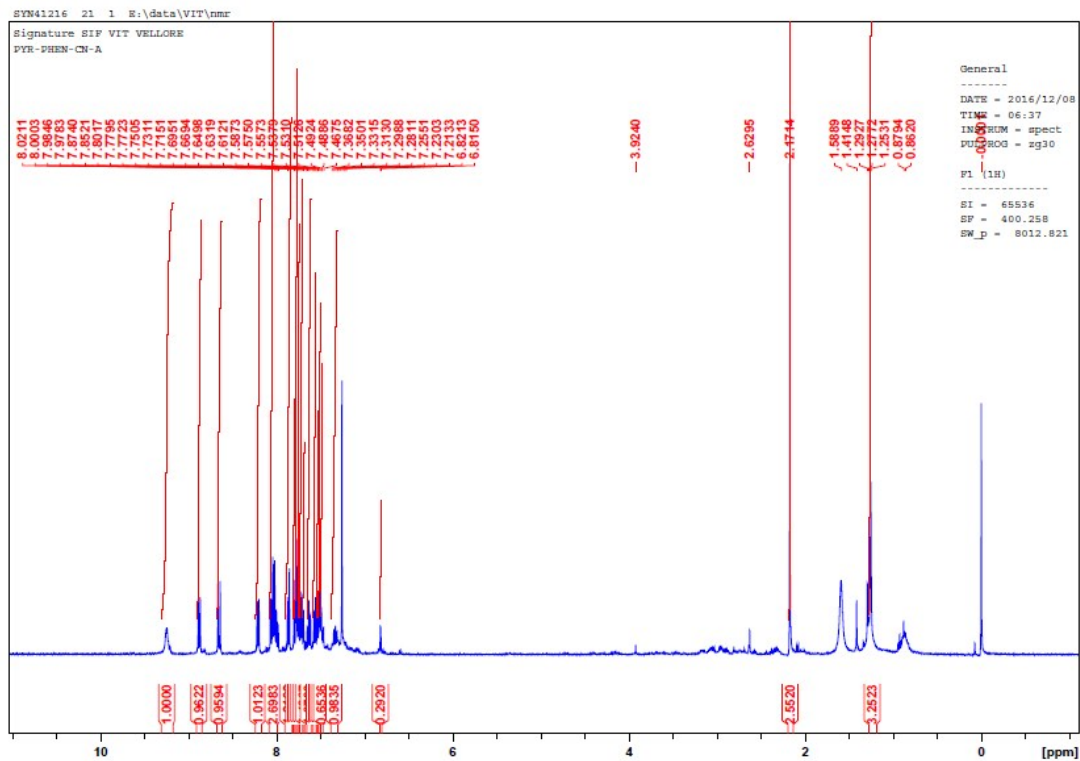

Figure S16:  $^{13}\text{C}$  Spectra of compound 2d

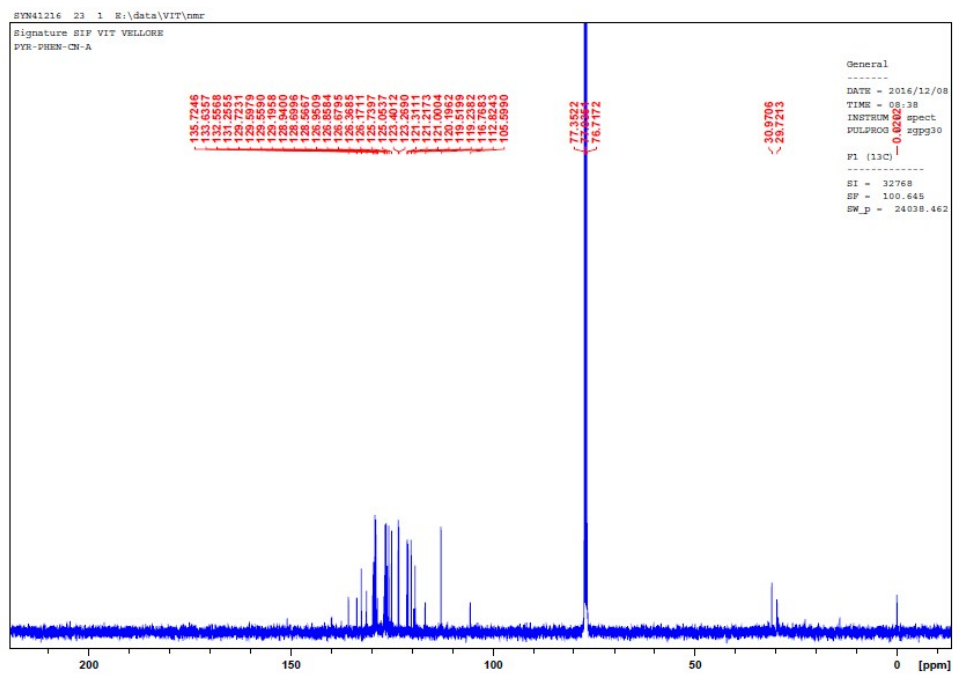

Figure S17: HRMS spectra of compound 2a

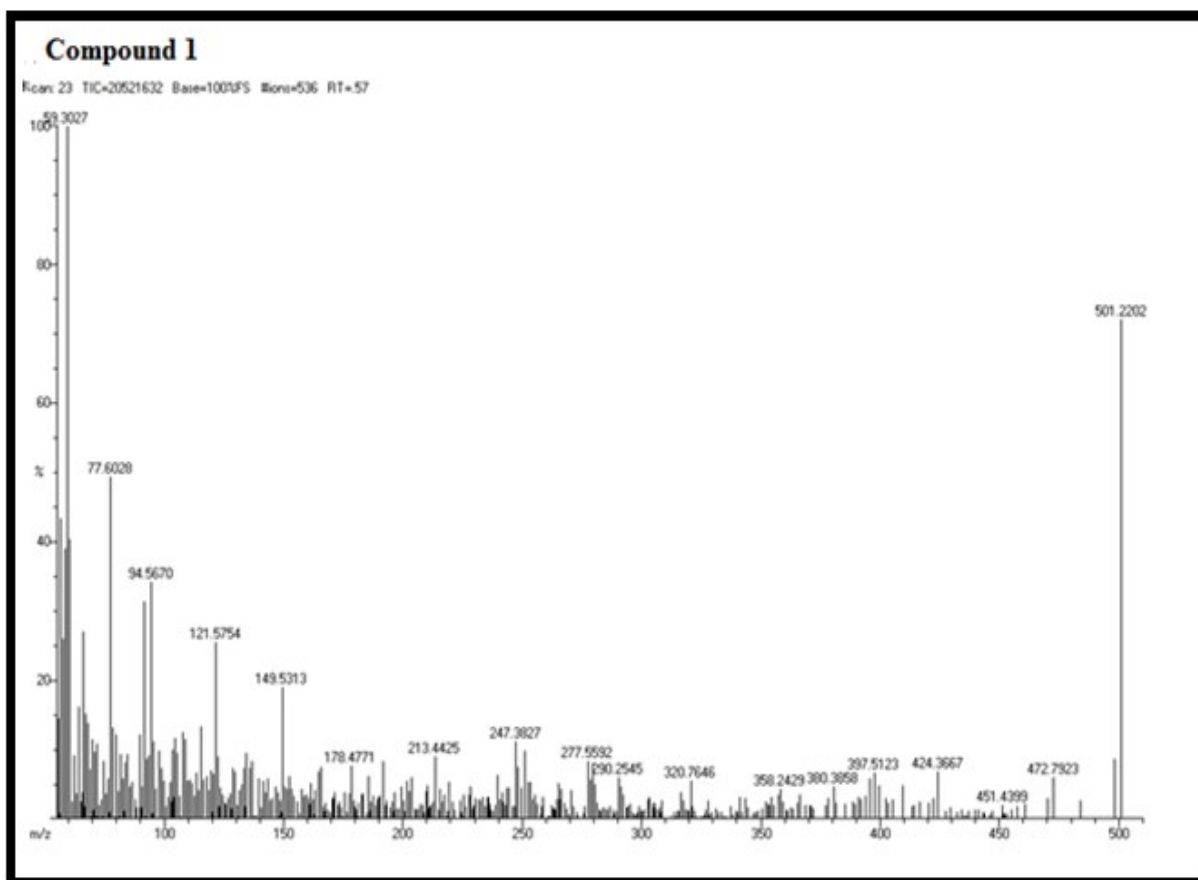

**Figure S18:** HRMS spectra of compound 2b

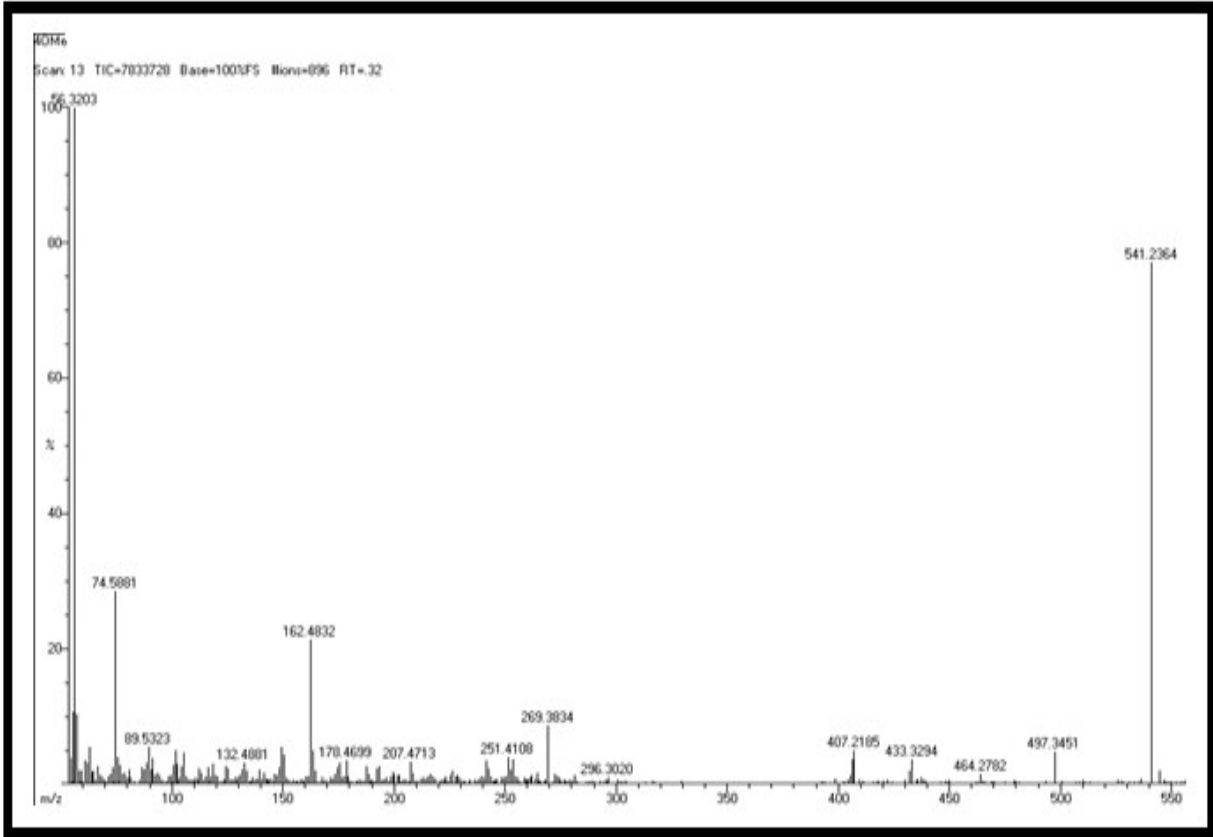

**Figure S19:** Normalized absorption spectra of compound 2a-2d ( $2 \times 10^{-5}$  M) in chloroform solvent.

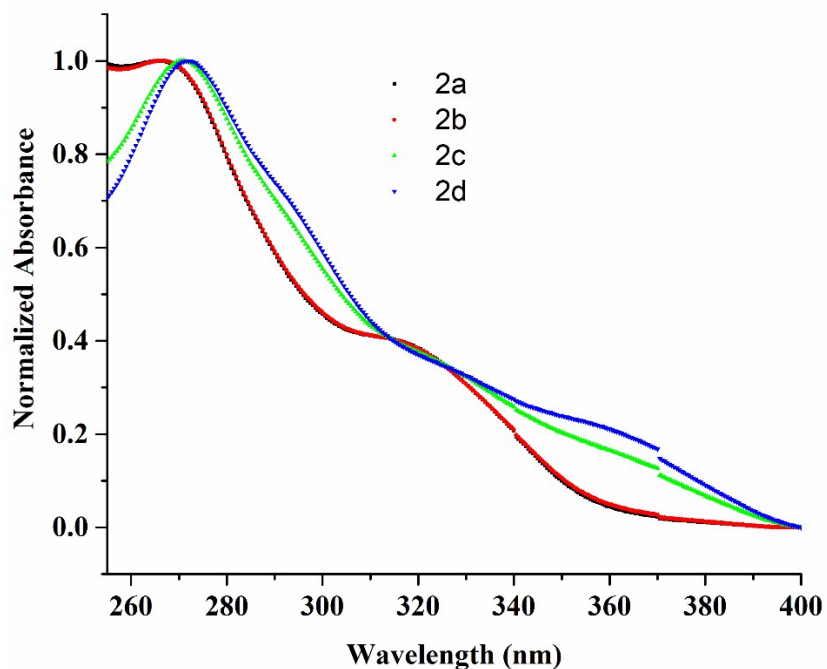

**Figure S20:** (A) The absorption spectra of the compound 2b ( $2 \times 10^{-5}$ ) in chloroform solvent over the addition of TFA. (B) The absorption spectra of the compound 2b with TFA over the addition of TEA.

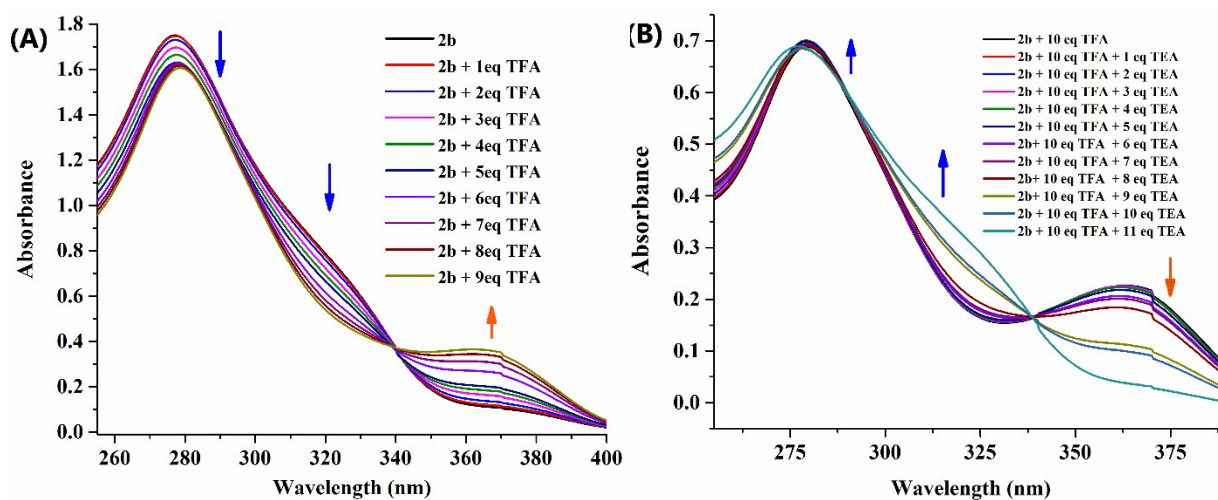

**Figure S21:** Normalized emission spectra of compound 2a & 2b ( $2 \times 10^{-5}$  M) in chloroform solvent ( $\lambda_{\text{ex}} = 267$  nm).

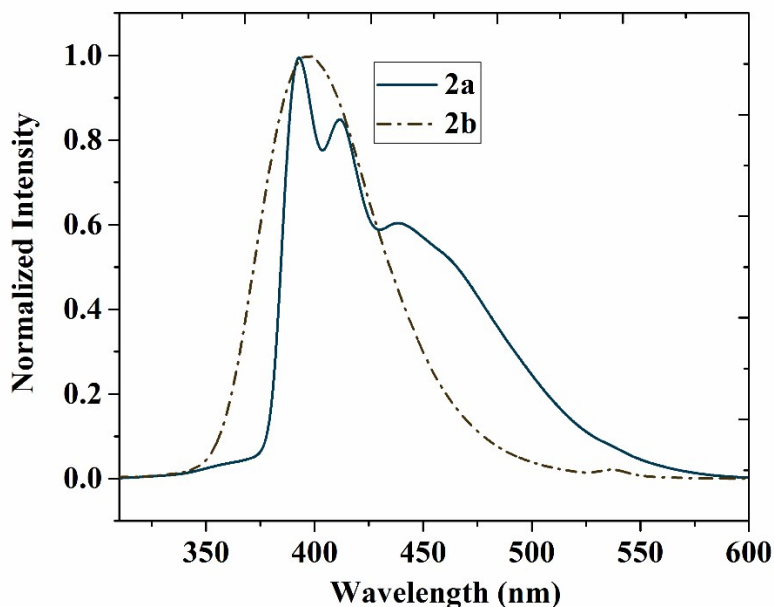

**Figure S22:** The ratio of the emission intensity  $I_{392}/I_{457}$  vs concentration of TFA for 2a (A) and  $I_{397}/I_{463}$  for 2b vs concentration of TFA (B).

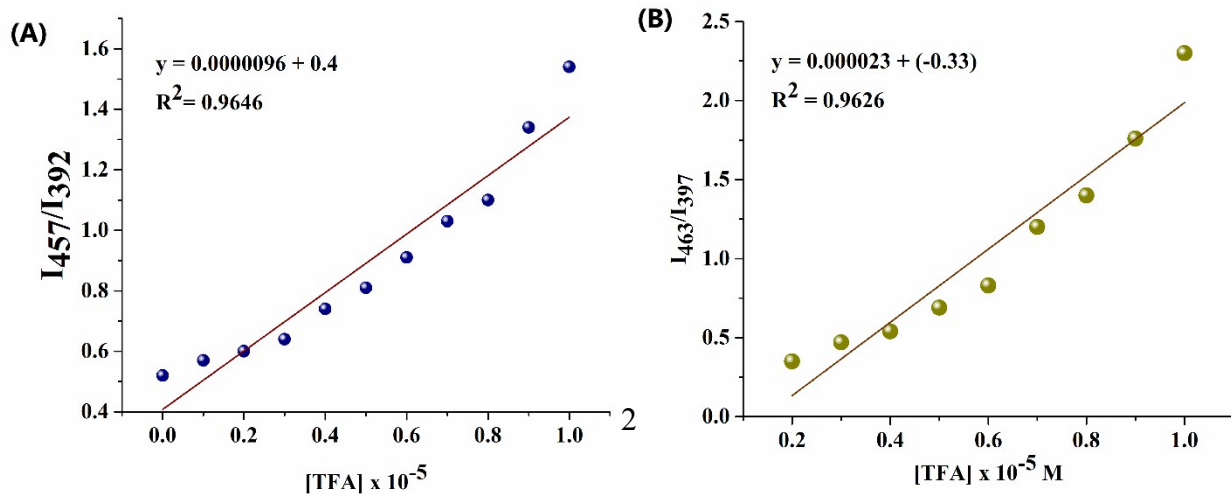

**Figure S23:** (A) Emission spectra of the compound 2a+ H<sup>+</sup> ( $2 \times 10^{-5}$ ) in chloroform solvent over the addition of TEA ( $\lambda_{\text{ex}} = 267$  nm). (B) Emission spectra of the compound 2b+ H<sup>+</sup> ( $2 \times 10^{-5}$ ) in chloroform solvent over the addition of TEA ( $\lambda_{\text{ex}} = 267$  nm).

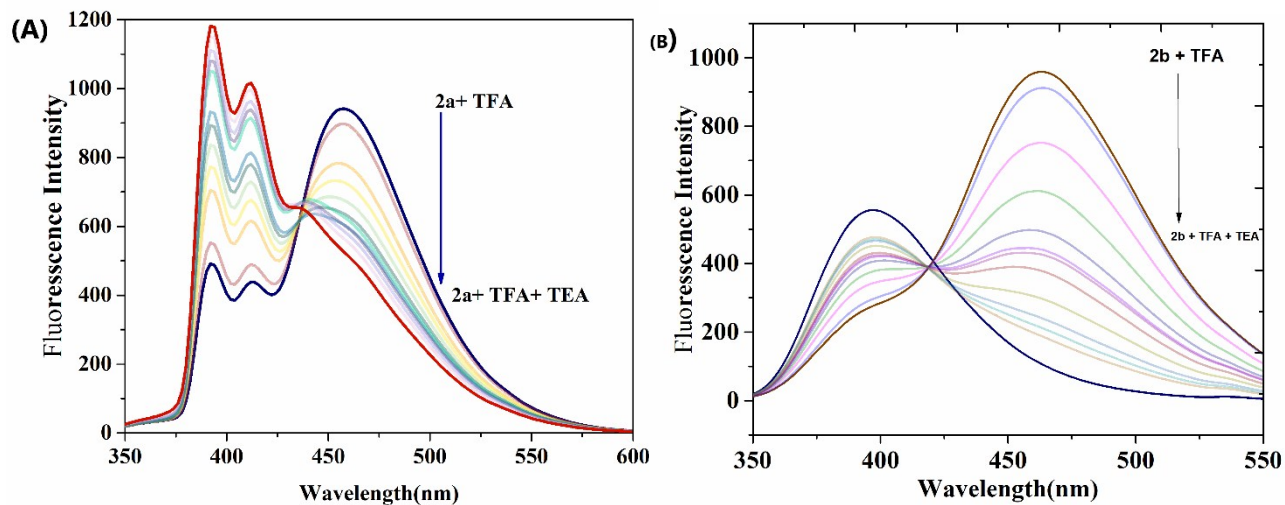

**Figure S24:** The fluorescence spectra of probe 2b ( $2 \times 10^{-5}$  M) over the addition of various testing ion (10.0 equiv. for each ion) in 1:1 PBS buffer (pH = 7.4) and acetonitrile solvent. The  $\lambda_{\text{ex}}$  was set to be 267nm.

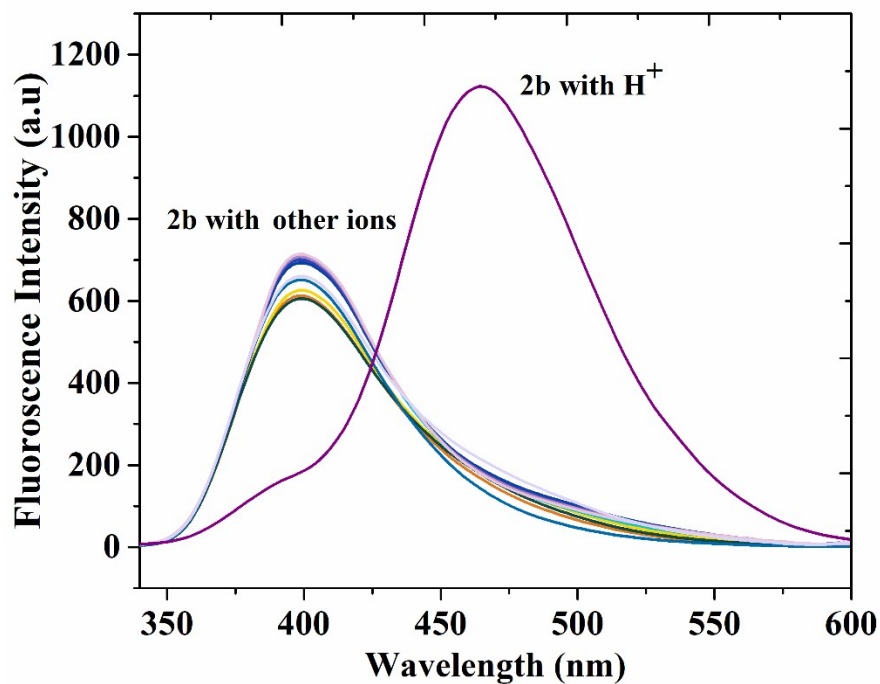



**Figure S25:** The optimized geometry of 2b at B3LYP/6-31+G\* level of theory. The implicit solvation model is used for structure optimization in TFA solvent. All hydrogen atoms are omitted for clarity

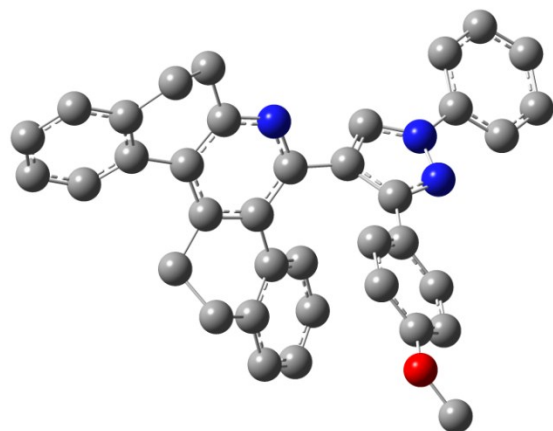

**Figure S26:** The optimized geometries of 2b with TFA solvent, named as 2b-TFA . The proposed solvent interaction is studied explicitly by considering one TFA molecule. In addition to that, the implicit solvation model is used for structure optimization in TFA solvent at B3LYP/6-31+G\* level of theory. All hydrogen atoms are omitted for clarity.

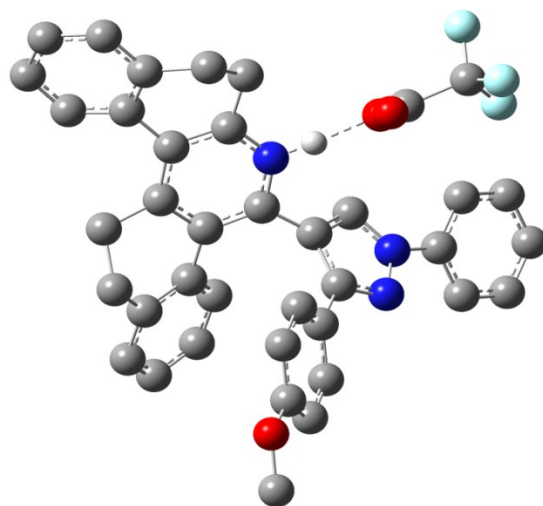

**Figure S27:** The FMO pairs responsible for the excitation energy in 2b and 2b-TFA. All orbitals are obtained from PCM/B3LYP/6-31+G\* single point calculation in TFA solvent. Isovalue for surface = 0.02. All hydrogen atoms are omitted for clarity.

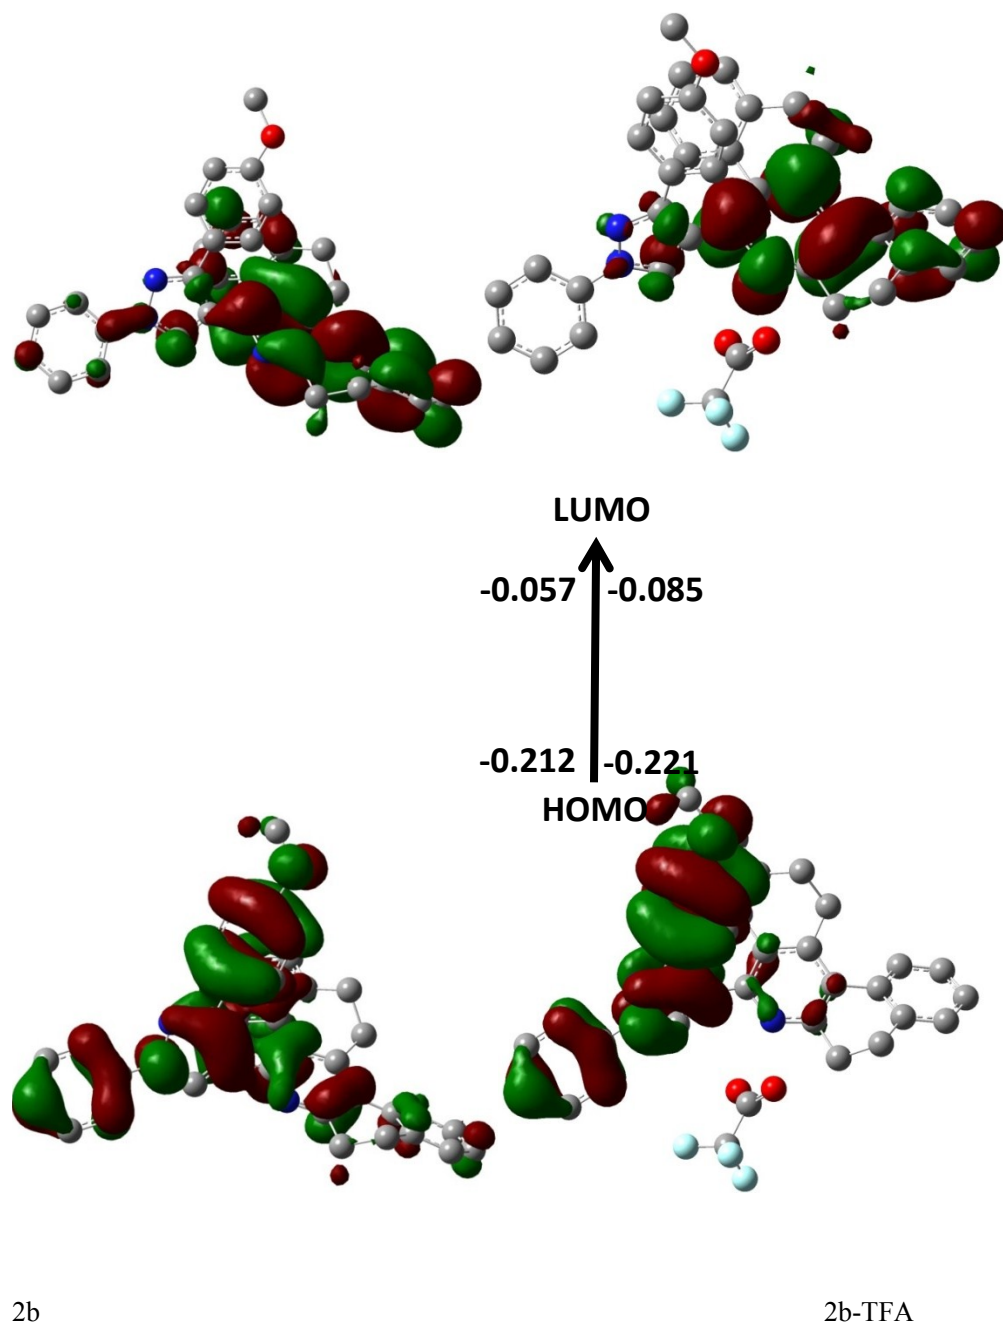

**Figure S28:** The MO pairs responsible for UV-Vis wavelength absorption maximum,  $\lambda_{\text{max}}$  (nm) in 2b and 2b-TFA. All orbitals are obtained from PCM/B3LYP/6-31+G\* single point calculation in TFA solvent. Isovalue for surface = 0.02. All hydrogen atoms are omitted for clarity

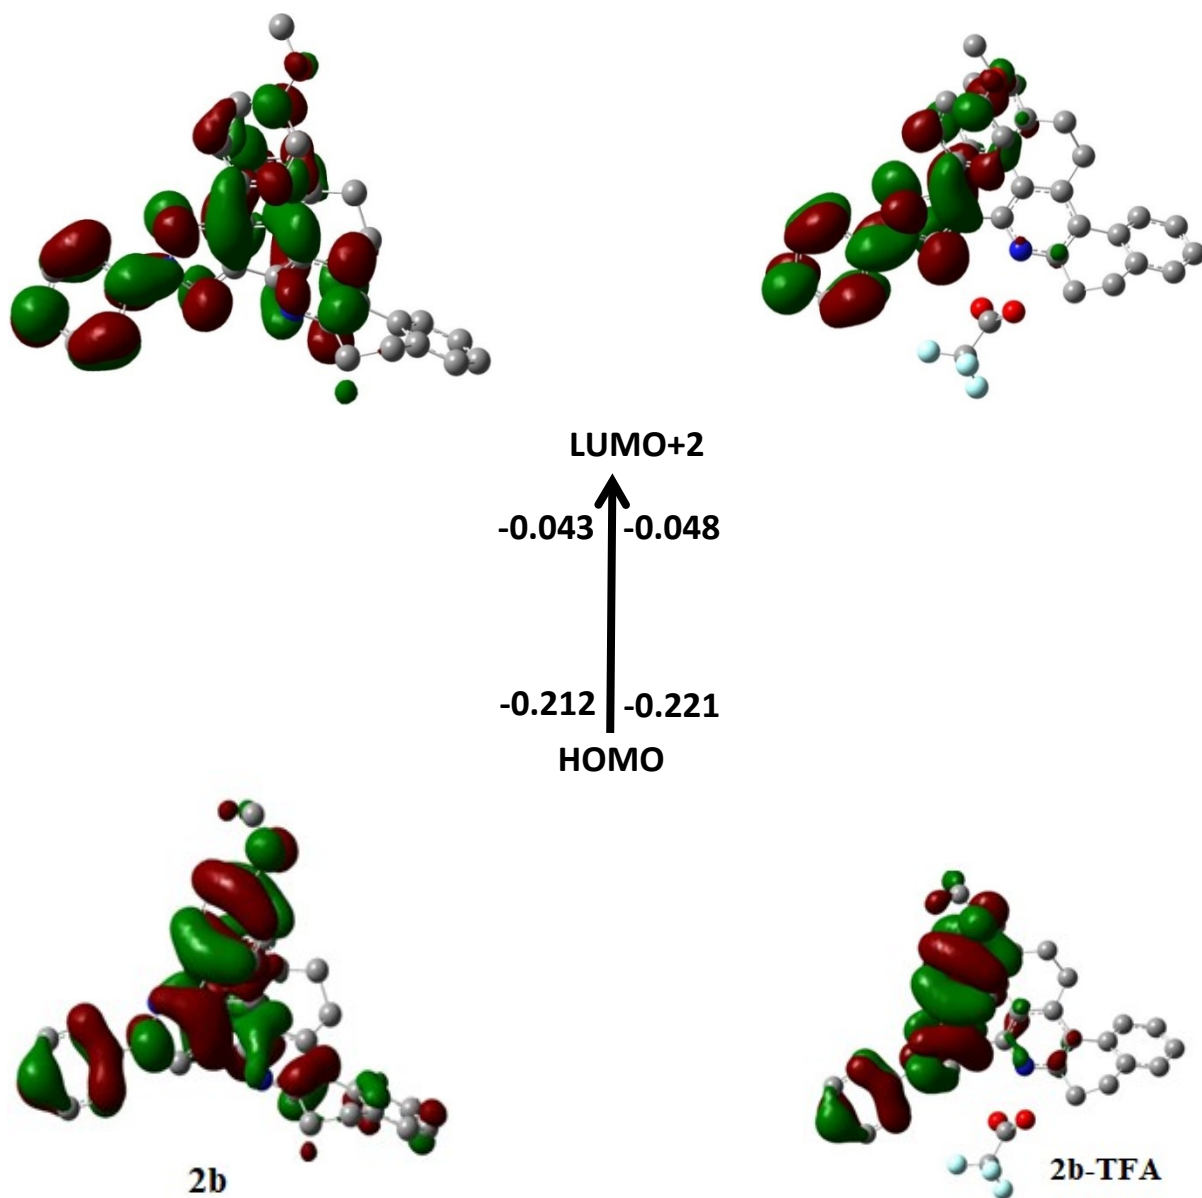

**Figure S29:** The cytotoxicity of 2a and 2b in *E.coli*

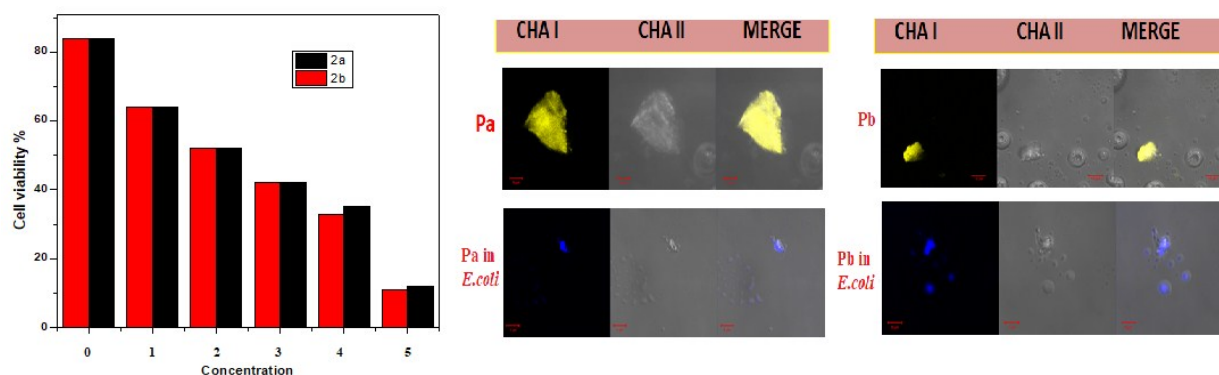

**Table S1:** Cartesian coordinates (in Å units) of the optimized ground state geometries of **2a** and **2b** in TFA solvent medium at B3LYP/6-31+G\* level of theory.

| 2a (in TFA solvent medium) |          |          |          | 2b(in TFA solvent medium) |          |          |          |
|----------------------------|----------|----------|----------|---------------------------|----------|----------|----------|
| C                          | 2.959469 | -0.87271 | -0.15303 | C                         | -3.09482 | -1.05848 | 0.008711 |
| C                          | 2.111721 | -1.84842 | 0.424445 | C                         | -2.29434 | -1.89474 | -0.80614 |
| N                          | 0.78695  | -1.71543 | 0.497262 | N                         | -0.96245 | -1.83242 | -0.83205 |
| C                          | 0.194948 | -0.62503 | -0.03141 | C                         | -0.3179  | -0.96521 | -0.02494 |
| C                          | 0.938022 | 0.406526 | -0.64609 | C                         | -1.01211 | -0.09005 | 0.839505 |
| C                          | 2.354735 | 0.313239 | -0.6175  | C                         | -2.43073 | -0.08137 | 0.77819  |
| C                          | 4.416902 | -1.17536 | -0.20886 | C                         | -4.56855 | -1.27244 | -0.02496 |
| C                          | 4.965991 | -2.05572 | 0.756557 | C                         | -5.14885 | -1.82645 | -1.19302 |
| C                          | 4.036601 | -2.69708 | 1.761415 | C                         | -4.239   | -2.23254 | -2.32983 |
| C                          | 2.721412 | -3.07338 | 1.065513 | C                         | -2.96178 | -2.86152 | -1.7568  |
| C                          | 0.326725 | 1.58472  | -1.32475 | C                         | -0.34769 | 0.82194  | 1.814286 |
| C                          | 1.030255 | 2.80956  | -1.30238 | C                         | -0.97732 | 2.049418 | 2.119361 |
| C                          | 2.381263 | 2.821438 | -0.63512 | C                         | -2.30879 | 2.326575 | 1.470512 |
| C                          | 3.143475 | 1.545136 | -1.02213 | C                         | -3.15414 | 1.044349 | 1.49415  |
| C                          | -0.87527 | 1.512194 | -2.05086 | C                         | 0.829865 | 0.480999 | 2.50301  |
| C                          | -1.39675 | 2.638465 | -2.69059 | C                         | 1.400259 | 1.357365 | 3.428381 |
| C                          | -0.72015 | 3.859788 | -2.62253 | C                         | 0.797873 | 2.591395 | 3.689523 |
| C                          | 0.496262 | 3.934281 | -1.93853 | C                         | -0.39462 | 2.924348 | 3.04131  |
| C                          | 5.26103  | -0.68635 | -1.22312 | C                         | -5.40286 | -1.02024 | 1.080057 |
| C                          | 6.621978 | -0.99898 | -1.24758 | C                         | -6.78011 | -1.24239 | 1.014591 |
| C                          | 7.166982 | -1.82101 | -0.25857 | C                         | -7.35235 | -1.73494 | -0.16053 |

|   |          |          |          |   |          |          |          |
|---|----------|----------|----------|---|----------|----------|----------|
| C | 6.331589 | -2.35417 | 0.727339 | C | -6.53001 | -2.0364  | -1.25005 |
| N | -3.39667 | -0.00528 | 0.754468 | N | 3.321694 | -0.38547 | -0.58216 |
| C | -2.10913 | 0.350216 | 0.835798 | C | 2.05893  | 0.057021 | -0.58225 |
| C | -1.27791 | -0.59236 | 0.150285 | C | 1.158367 | -0.98053 | -0.17836 |
| C | -2.16029 | -1.54249 | -0.32641 | C | 1.972288 | -2.0746  | 0.041742 |
| N | -3.41641 | -1.15872 | 0.039173 | N | 3.258142 | -1.68618 | -0.19293 |
| C | -1.73063 | 1.554049 | 1.602539 | C | 1.765394 | 1.440225 | -1.00072 |
| C | -4.64472 | -1.82099 | -0.23341 | C | 4.441048 | -2.46541 | -0.0776  |
| C | -0.5601  | 1.577769 | 2.380436 | C | 0.619577 | 1.749414 | -1.75858 |
| C | -0.2251  | 2.709385 | 3.128117 | C | 0.361807 | 3.051212 | -2.17383 |
| C | -1.05518 | 3.834655 | 3.114361 | C | 1.248699 | 4.087805 | -1.84207 |
| C | -2.22566 | 3.818751 | 2.347746 | C | 2.399127 | 3.799182 | -1.09528 |
| C | -2.56022 | 2.689641 | 1.598153 | C | 2.644495 | 2.48591  | -0.68455 |
| C | -5.8313  | -1.08012 | -0.30275 | C | 5.668962 | -1.83121 | 0.151879 |
| C | -7.03422 | -1.73338 | -0.57621 | C | 6.828297 | -2.59911 | 0.273396 |
| C | -7.06124 | -3.11566 | -0.79046 | C | 6.772668 | -3.99366 | 0.177669 |
| C | -5.87165 | -3.84678 | -0.71849 | C | 5.543068 | -4.6179  | -0.05302 |
| C | -4.66328 | -3.2076  | -0.43215 | C | 4.377503 | -3.86077 | -0.18995 |
| H | 4.507638 | -3.58097 | 2.20467  | O | 0.907988 | 5.333989 | -2.28981 |
| H | 3.822152 | -2.0007  | 2.586713 | C | 1.776391 | 6.427718 | -1.99038 |
| H | 2.922377 | -3.8378  | 0.298871 | H | -4.7525  | -2.93514 | -2.99479 |
| H | 2.000375 | -3.49889 | 1.769607 | H | -3.96819 | -1.35575 | -2.93809 |
| H | 2.952263 | 3.707559 | -0.93242 | H | -3.22117 | -3.7907  | -1.22588 |
| H | 2.272577 | 2.858817 | 0.459109 | H | -2.25305 | -3.1248  | -2.54737 |
| H | 3.321497 | 1.555519 | -2.10786 | H | -2.83312 | 3.134593 | 1.992019 |
| H | 4.124489 | 1.534929 | -0.53999 | H | -2.17252 | 2.650058 | 0.427757 |
| H | -1.40391 | 0.568928 | -2.12866 | H | -3.35669 | 0.774563 | 2.541446 |
| H | -2.32762 | 2.557726 | -3.24619 | H | -4.1223  | 1.226226 | 1.020263 |
| H | -1.12431 | 4.740695 | -3.11487 | H | 1.300467 | -0.4795  | 2.326879 |
| H | 1.046886 | 4.872338 | -1.90887 | H | 2.310616 | 1.070733 | 3.948816 |
| H | 4.852918 | -0.07831 | -2.02225 | H | 1.240149 | 3.278904 | 4.406114 |
| H | 7.249057 | -0.60804 | -2.04466 | H | -0.88839 | 3.868417 | 3.262373 |
| H | 8.225751 | -2.06675 | -0.2681  | H | -4.97561 | -0.6744  | 2.0142   |
| H | 6.741507 | -3.02697 | 1.477716 | H | -7.3993  | -1.04013 | 1.88472  |
| H | -1.98062 | -2.4194  | -0.93062 | H | -8.42378 | -1.90762 | -0.22126 |
| H | 0.080939 | 0.70184  | 2.416768 | H | -6.96352 | -2.45742 | -2.15481 |
| H | 0.681018 | 2.70734  | 3.728881 | H | 1.724664 | -3.06585 | 0.391371 |
| H | -0.79399 | 4.71448  | 3.696823 | H | -0.0695  | 0.959942 | -2.04382 |
| H | -2.87682 | 4.689117 | 2.328871 | H | -0.51998 | 3.282187 | -2.76487 |
| H | -3.46492 | 2.683193 | 0.997544 | H | 3.101865 | 4.578568 | -0.823   |
| H | -5.80222 | -0.00802 | -0.14511 | H | 3.533827 | 2.27339  | -0.09858 |
| H | -7.95272 | -1.15509 | -0.62942 | H | 5.70474  | -0.75108 | 0.233643 |
| H | -7.99993 | -3.61807 | -1.00656 | H | 7.778063 | -2.10196 | 0.451685 |
| H | -5.88054 | -4.92268 | -0.87002 | H | 7.67753  | -4.58657 | 0.277332 |

|   |         |          |          |   |          |          |          |
|---|---------|----------|----------|---|----------|----------|----------|
| H | -3.7504 | -3.78829 | -0.34501 | H | 5.486621 | -5.6994  | -0.14179 |
|   |         |          |          | H | 3.434607 | -4.35516 | -0.40069 |
|   |         |          |          | H | 1.313742 | 7.304754 | -2.44489 |
|   |         |          |          | H | 1.863265 | 6.578194 | -0.90759 |
|   |         |          |          | H | 2.771826 | 6.271937 | -2.42324 |

**Table S2:** Cartesian coordinates (in Å units) of the optimized ground state geometries of **2a-TFA** and **2b-TFA** in TFA solvent medium at B3LYP/6-31+G\* level of theory.

| <b>2a-TFA (in TFA solvent medium)</b> |          |          |          | <b>2b-TFA (in TFA solvent medium)</b> |          |          |          |
|---------------------------------------|----------|----------|----------|---------------------------------------|----------|----------|----------|
| C                                     | -3.1222  | 0.552964 | -0.63369 | C                                     | 3.06928  | -1.07576 | -0.68547 |
| C                                     | -2.06068 | 1.462042 | -0.48046 | C                                     | 1.973688 | -1.88053 | -0.32722 |
| N                                     | -0.80055 | 1.008561 | -0.38387 | N                                     | 0.734711 | -1.36256 | -0.32875 |
| C                                     | -0.44725 | -0.3044  | -0.45587 | C                                     | 0.434027 | -0.08468 | -0.69032 |
| C                                     | -1.46227 | -1.26053 | -0.60884 | C                                     | 1.485398 | 0.767358 | -1.06065 |
| C                                     | -2.81769 | -0.82556 | -0.59067 | C                                     | 2.82204  | 0.288789 | -0.95411 |
| C                                     | -4.48173 | 1.134221 | -0.80275 | C                                     | 4.401262 | -1.73857 | -0.72457 |
| C                                     | -4.74397 | 2.413506 | -0.25553 | C                                     | 4.61831  | -2.87122 | 0.096668 |
| C                                     | -3.6206  | 3.156185 | 0.429021 | C                                     | 3.474463 | -3.39155 | 0.935315 |
| C                                     | -2.30997 | 2.938234 | -0.3415  | C                                     | 2.163615 | -3.29678 | 0.140131 |
| C                                     | -1.19069 | -2.71398 | -0.78672 | C                                     | 1.270799 | 2.152243 | -1.56407 |
| C                                     | -2.12837 | -3.63194 | -0.26691 | C                                     | 2.255289 | 3.122283 | -1.27844 |
| C                                     | -3.36532 | -3.07014 | 0.384166 | C                                     | 3.478915 | 2.671262 | -0.52365 |
| C                                     | -3.88197 | -1.8942  | -0.45954 | C                                     | 3.931733 | 1.311471 | -1.07677 |
| C                                     | -0.09091 | -3.20069 | -1.51464 | C                                     | 0.180126 | 2.506964 | -2.37692 |
| C                                     | 0.104477 | -4.57284 | -1.67605 | C                                     | 0.040974 | 3.811517 | -2.85199 |
| C                                     | -0.7999  | -5.48008 | -1.11611 | C                                     | 0.992996 | 4.781653 | -2.52547 |
| C                                     | -1.91697 | -5.00464 | -0.42481 | C                                     | 2.100349 | 4.428973 | -1.75006 |
| C                                     | -5.49072 | 0.497297 | -1.54756 | C                                     | 5.425194 | -1.33098 | -1.59874 |
| C                                     | -6.75156 | 1.07755  | -1.6936  | C                                     | 6.658638 | -1.98369 | -1.61536 |
| C                                     | -7.02268 | 2.313795 | -1.10233 | C                                     | 6.886875 | -3.06497 | -0.7609  |
| C                                     | -6.01408 | 2.978827 | -0.40024 | C                                     | 5.861791 | -3.50935 | 0.078276 |
| N                                     | 2.982781 | -1.40163 | 0.414723 | N                                     | -2.93323 | 1.324048 | -0.05662 |
| C                                     | 1.671488 | -1.3804  | 0.66454  | C                                     | -1.61805 | 1.311651 | 0.17352  |
| C                                     | 0.991531 | -0.58049 | -0.30915 | C                                     | -0.98902 | 0.279682 | -0.59671 |
| C                                     | 1.993936 | -0.11523 | -1.14286 | C                                     | -2.02559 | -0.32745 | -1.28479 |
| N                                     | 3.164736 | -0.63152 | -0.68982 | N                                     | -3.16687 | 0.326652 | -0.95135 |
| C                                     | 1.131252 | -2.08972 | 1.841041 | C                                     | -1.0259  | 2.256627 | 1.137147 |

|   |          |          |          |   |          |          |          |
|---|----------|----------|----------|---|----------|----------|----------|
| C | 4.467538 | -0.44176 | -1.23534 | C | -4.48726 | 0.068832 | -1.41934 |
| C | 0.115493 | -1.51873 | 2.626459 | C | 0.011131 | 1.867554 | 2.006493 |
| C | -0.36988 | -2.18554 | 3.753965 | C | 0.544959 | 2.758416 | 2.930498 |
| C | 0.155095 | -3.42984 | 4.116241 | C | 0.051371 | 4.070359 | 3.014144 |
| C | 1.172265 | -4.00228 | 3.344416 | C | -0.98783 | 4.47329  | 2.163463 |
| C | 1.656863 | -3.33857 | 2.216268 | C | -1.51324 | 3.56755  | 1.238578 |
| C | 5.419557 | -1.4607  | -1.1162  | C | -5.41265 | 1.11719  | -1.48364 |
| C | 6.691157 | -1.27595 | -1.66161 | C | -6.70326 | 0.863633 | -1.95123 |
| C | 7.011676 | -0.08972 | -2.33048 | C | -7.07062 | -0.42207 | -2.36234 |
| C | 6.053088 | 0.922008 | -2.44134 | C | -6.13861 | -1.46188 | -2.29184 |
| C | 4.781648 | 0.756237 | -1.88746 | C | -4.84835 | -1.22538 | -1.81235 |
| H | -3.84655 | 4.225318 | 0.483746 | H | 3.657191 | -4.42959 | 1.228938 |
| H | -3.49432 | 2.802478 | 1.462588 | H | 3.376781 | -2.80943 | 1.863248 |
| H | -2.38857 | 3.387028 | -1.34268 | H | 2.210952 | -3.96251 | -0.73424 |
| H | -1.47044 | 3.413195 | 0.170845 | H | 1.312392 | -3.60717 | 0.750182 |
| H | -4.1421  | -3.83673 | 0.468335 | H | 4.288091 | 3.401458 | -0.62464 |
| H | -3.14567 | -2.71952 | 1.403013 | H | 3.262485 | 2.57545  | 0.550247 |
| H | -4.16833 | -2.27083 | -1.45235 | H | 4.219255 | 1.437032 | -2.13085 |
| H | -4.78121 | -1.4676  | -0.00822 | H | 4.818604 | 0.960162 | -0.54371 |
| H | 0.609731 | -2.51009 | -1.96966 | H | -0.5572  | 1.76266  | -2.65473 |
| H | 0.959237 | -4.93032 | -2.24387 | H | -0.8075  | 4.065859 | -3.4815  |
| H | -0.64784 | -6.54968 | -1.23458 | H | 0.885414 | 5.800105 | -2.88939 |
| H | -2.64185 | -5.70447 | -0.01523 | H | 2.862013 | 5.170438 | -1.51963 |
| H | -5.28931 | -0.44352 | -2.04601 | H | 5.256257 | -0.51887 | -2.29593 |
| H | -7.51374 | 0.567556 | -2.27622 | H | 7.432971 | -1.65212 | -2.30163 |
| H | -8.00339 | 2.76987  | -1.20791 | H | 7.846267 | -3.57535 | -0.76498 |
| H | -6.20888 | 3.959164 | 0.028464 | H | 6.021525 | -4.37469 | 0.717312 |
| H | 1.940276 | 0.496582 | -2.03111 | H | -2.01237 | -1.13295 | -2.00377 |
| H | -0.27854 | -0.53838 | 2.37454  | H | 0.389116 | 0.849623 | 1.982327 |
| H | -1.14966 | -1.7257  | 4.355581 | H | 1.337377 | 2.450351 | 3.606499 |
| H | -0.22168 | -3.94712 | 4.99475  | H | -1.38943 | 5.479369 | 2.205299 |
| H | 1.586883 | -4.9688  | 3.619217 | H | -2.31209 | 3.890254 | 0.577634 |
| H | 2.441612 | -3.7868  | 1.614274 | H | -5.11804 | 2.112479 | -1.17065 |
| H | 5.159993 | -2.38068 | -0.60458 | H | -7.42081 | 1.678168 | -1.99999 |
| H | 7.43017  | -2.06706 | -1.56873 | H | -8.07554 | -0.61292 | -2.72832 |
| H | 8.001862 | 0.047317 | -2.7559  | H | -6.41681 | -2.46786 | -2.59346 |
| H | 6.296134 | 1.853552 | -2.94476 | H | -4.14291 | -2.04543 | -1.72408 |
| H | 4.054006 | 1.559714 | -1.94348 | C | -1.34299 | -3.54816 | 1.505739 |
| C | 1.17408  | 3.541066 | 1.015339 | O | -0.57328 | -3.40255 | 2.468092 |
| O | 0.409301 | 3.503307 | 1.991227 | O | -1.29435 | -3.05355 | 0.344135 |
| O | 1.147158 | 2.882753 | -0.06349 | H | -0.05941 | -1.99016 | -0.00943 |
| H | -0.03312 | 1.722967 | -0.21211 | C | -2.54873 | -4.52749 | 1.709017 |
| C | 2.35485  | 4.569002 | 1.072051 | F | -3.70703 | -4.04003 | 1.197546 |
| F | 3.553236 | 3.979525 | 0.822845 | F | -2.7875  | -4.8197  | 3.007076 |

|   |          |          |          |   |          |          |          |
|---|----------|----------|----------|---|----------|----------|----------|
| F | 2.4671   | 5.194043 | 2.264952 | F | -2.30873 | -5.71328 | 1.077359 |
| F | 2.193601 | 5.543779 | 0.132785 | O | 0.641567 | 4.872143 | 3.94878  |
|   |          |          |          | C | 0.168701 | 6.21224  | 4.098461 |
|   |          |          |          | H | 0.30695  | 6.785405 | 3.173967 |
|   |          |          |          | H | -0.88816 | 6.227329 | 4.389865 |
|   |          |          |          | H | 0.773143 | 6.650411 | 4.893598 |

**Table S3:** The absolute energy of the optimized ground state geometries of **2a**, **2b**, **2a-TFA**, and **2b-TFA** in TFA solvent medium at B3LYP/6-31+G\* level of theory

| <b>Systems</b> | <b>Absolute Energy (a.u)</b> |
|----------------|------------------------------|
| <b>2a</b>      | -1552.4382982                |
| <b>2b</b>      | -1666.9668221                |
| <b>2a-TFA</b>  | -2079.290255                 |
| <b>2b-TFA</b>  | -2193.8190271                |
